# Supplementary material for: The ion gating effect: using a change in flexibility to allow label free electrochemical detection of DNA hybridisationElectronic supplementary information (ESI) available: CVs: ss-DNA modified electrode exposed to a non-complementary sequence; MCE-modified gold electrode. See http://www.rsc.org/suppdata/cc/b3/b305798b/
Source: Royal Society of Chemistry journal article supplement (doi:10.1039/b305798b), 2003-01-01
Supplement: b305798b.pdf [file b305798b.pdf]

## Supplementary Information

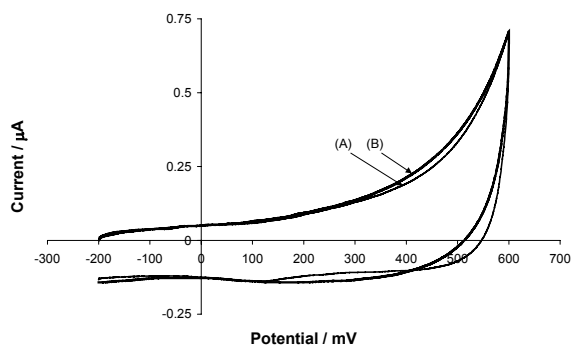

(A) A cyclic voltammogram of the ss-DNA modified electrode performed in 0.05M phosphate and 0.3M NaCl (pH 7.0) with an Ag/Ag/Cl reference electrode and a platinum flag auxiliary electrode. (B) A cyclic voltammogram of the same modified electrode after being exposed to a non-complementary sequence in solution.  
Supplementary Information, MCE:

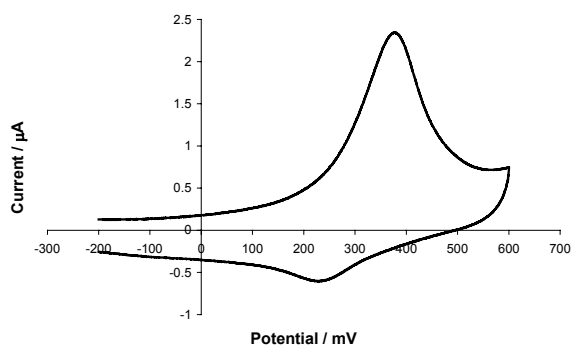

A cyclic voltammogram of a MCE-modified gold electrode in 0.05M phosphate and 0.3M NaCl (pH 7.0)
